# Supplementary material for: Chemical durability engineering of solution-processed oxide thin films and its application in chemically-robust patterned oxide thin-film transistors
Source: Royal Society of Chemistry journal article supplement (doi:10.1039/c6tc04094b), 2016-12-15
Supplement: c6tc04094b1.pdf [file c6tc04094b1.pdf]

## Supporting Information

# Chemical durability engineering of solution-processed oxide thin films and its application for chemically-robust patterned oxide thin-film transistors

Sung Woon Cho,<sup>‡</sup> Da Eun Kim,<sup>‡</sup> Won Jun Kang, Bora Kim, Dea Ho Yoon, Kyung Su Kim, Hyung Koun Cho,\* Yong-Hoon Kim, and Yunseok Kim

School of Advanced Materials Science and Engineering, Sungkyunkwan University,  
2066 Seobu-ro, Jangan-gu, Suwon, Gyeonggi-do 16419, Republic of Korea

### Corresponding Author

\*Tel.: +82 31 290 7364. Fax: +82 31 290 7410. E-mail: [chohk@skku.edu](mailto:chohk@skku.edu).

<sup>‡</sup>S.W.C. and D.E.K. contributed equally to this work.

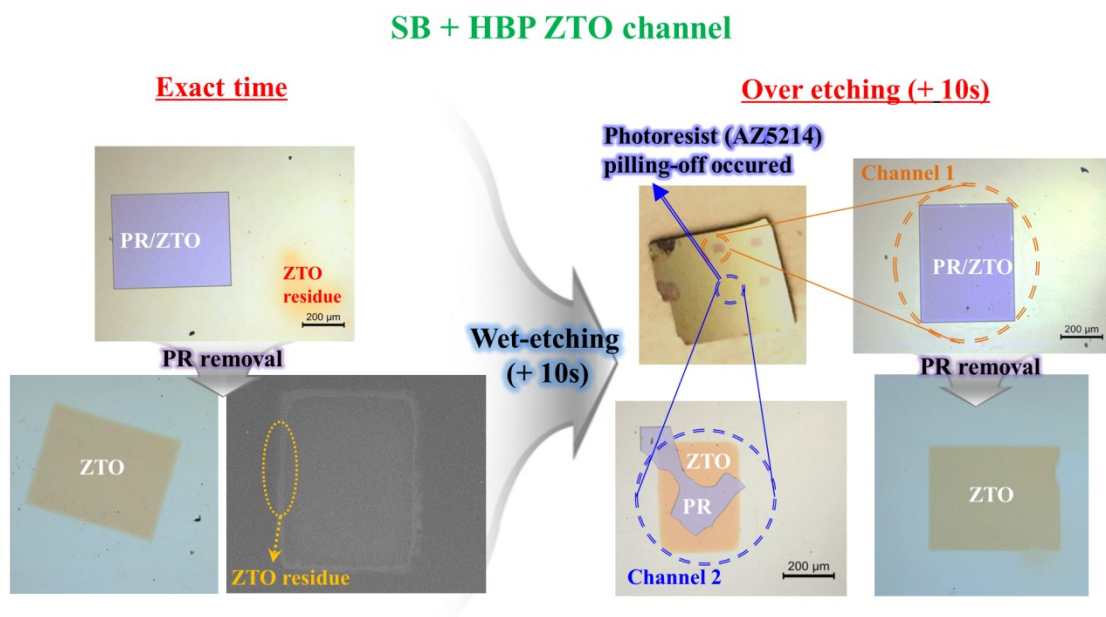

**Figure S1.** Chemically robust 25 nm-SB + HB ZTO channels patterned (SB + HBP ZTO channel) using a low-pH HCl ( $\text{pH} \approx 0$ ) wet etchant. (a) Exact- and (b) over-etching.

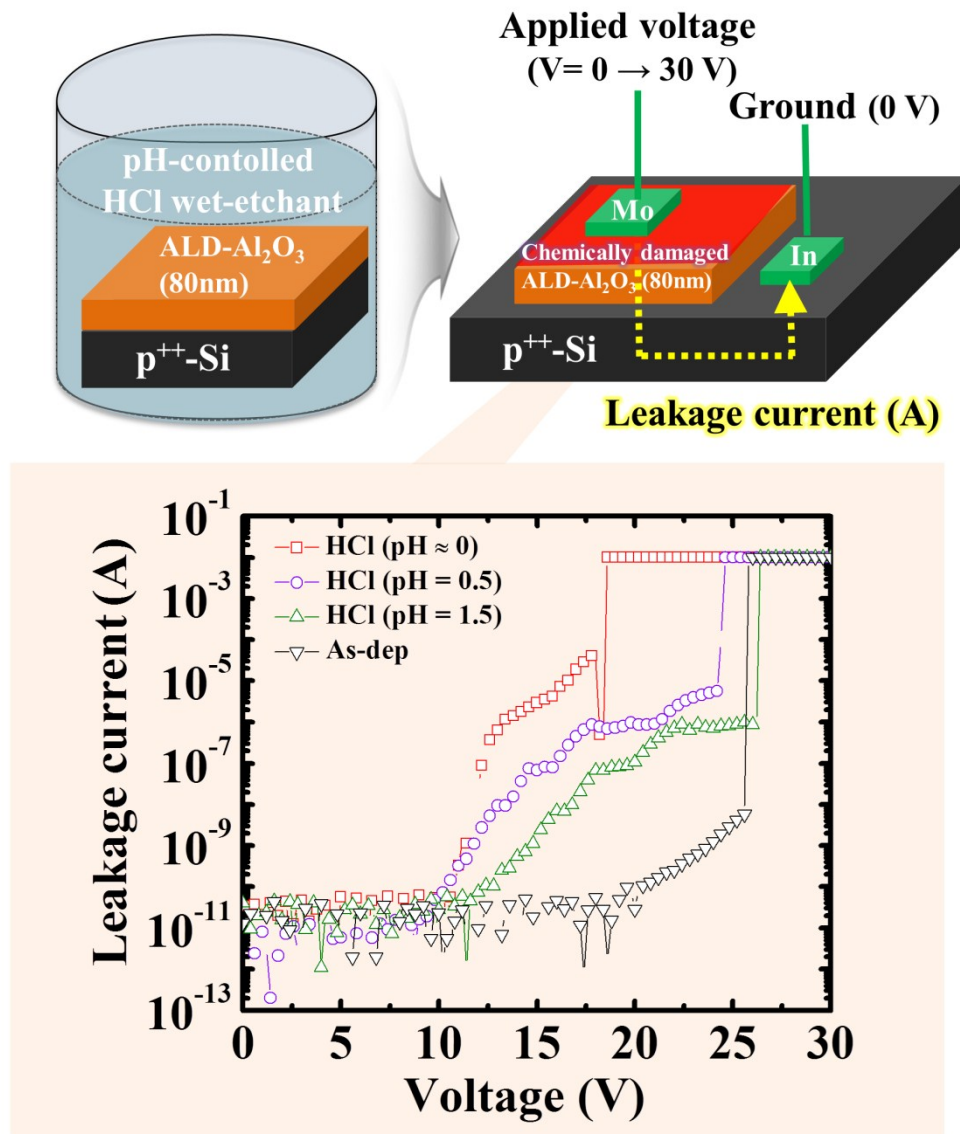

**Figure S2.** Leakage current-voltage curves for ALD- $\text{Al}_2\text{O}_3$  films (80 nm) on Si substrate immersed in pH-controlled HCl wet etchants for 60 s.

## XPS spectra for O 1s

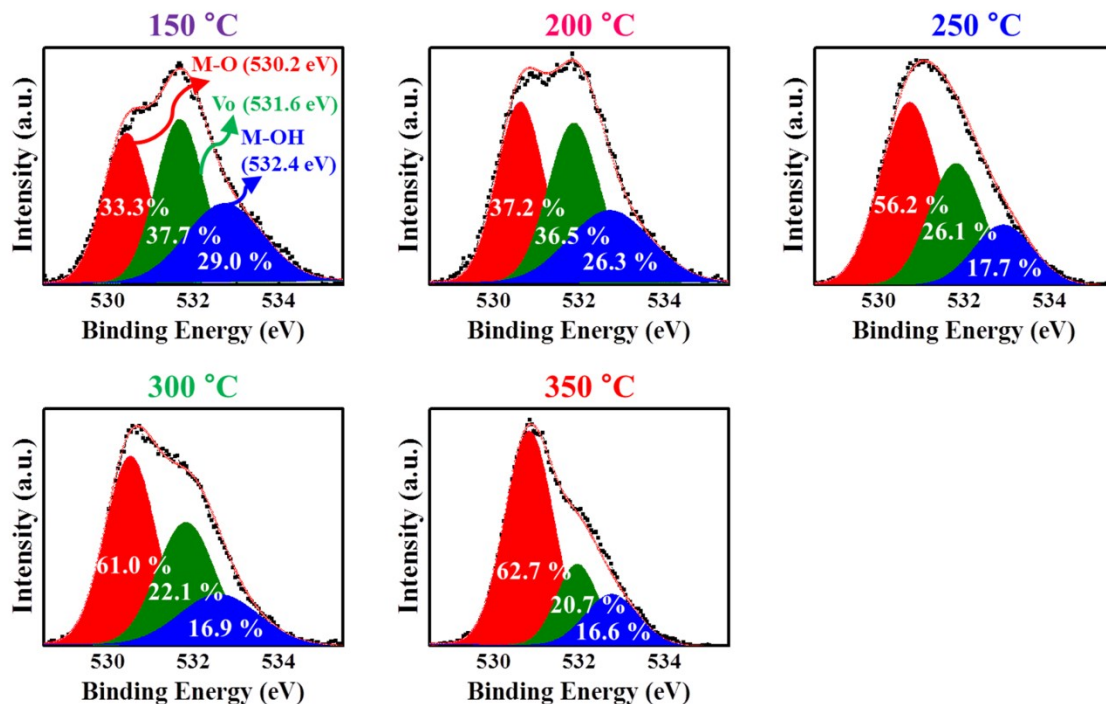

**Figure S3.** XPS O 1s peaks of sol-gel processed SB ZTO films annealed at various SB annealing temperatures (150–350 °C). (a) 150 °C, (b) 200 °C, (c) 250 °C, (d) 300 °C, and (e) 350 °C. Individual O 1s peaks were deconvoluted using the Lorentzian-Gaussian distribution into three sub-peaks; metal-oxygen (M-O,  $530.2 \pm 0.05$  eV, red curve), oxygen deficiency (V<sub>O</sub>,  $531.6 \pm 0.02$  eV, green curve), and metal-hydroxide bonds (M-OH,  $532.4 \pm 0.01$  eV, blue curve).

## SBP + HB ZTO channel

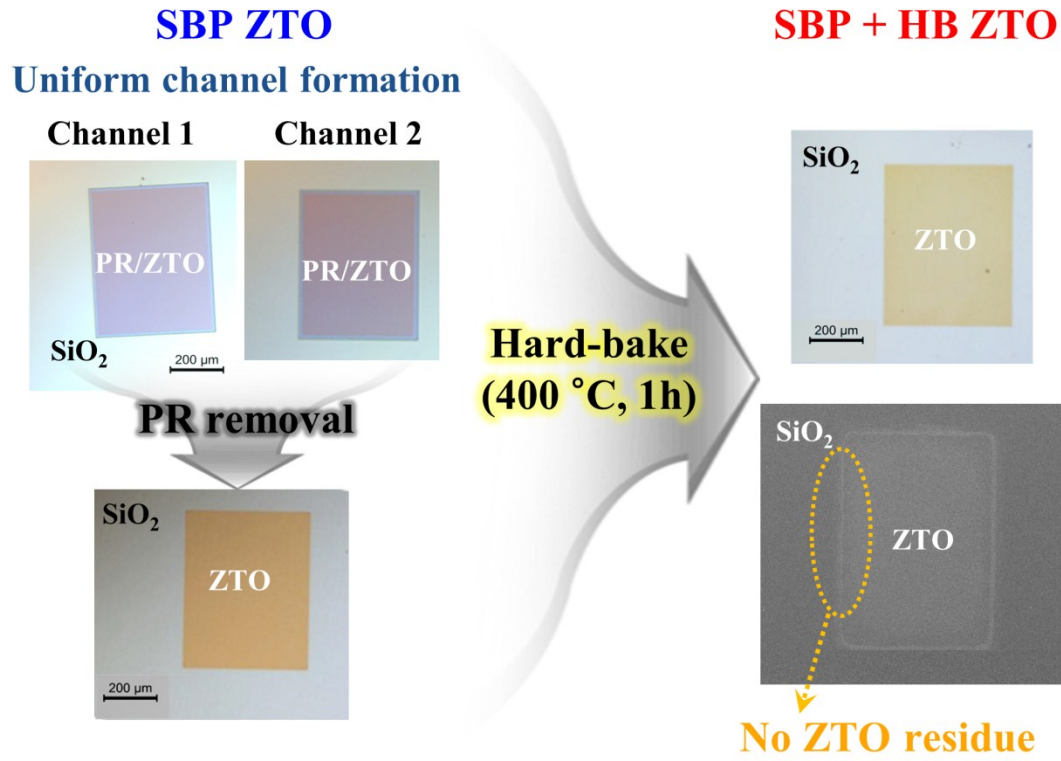

**Figure S4.** (a) Chemically weak SB ZTO channel patterned (SBP ZTO) using a mild-pH HCl (pH = 1.5) wet etchant. (b) Chemically robust SBP ZTO channel hard-baked (SBP + HB ZTO) at 400 °C.

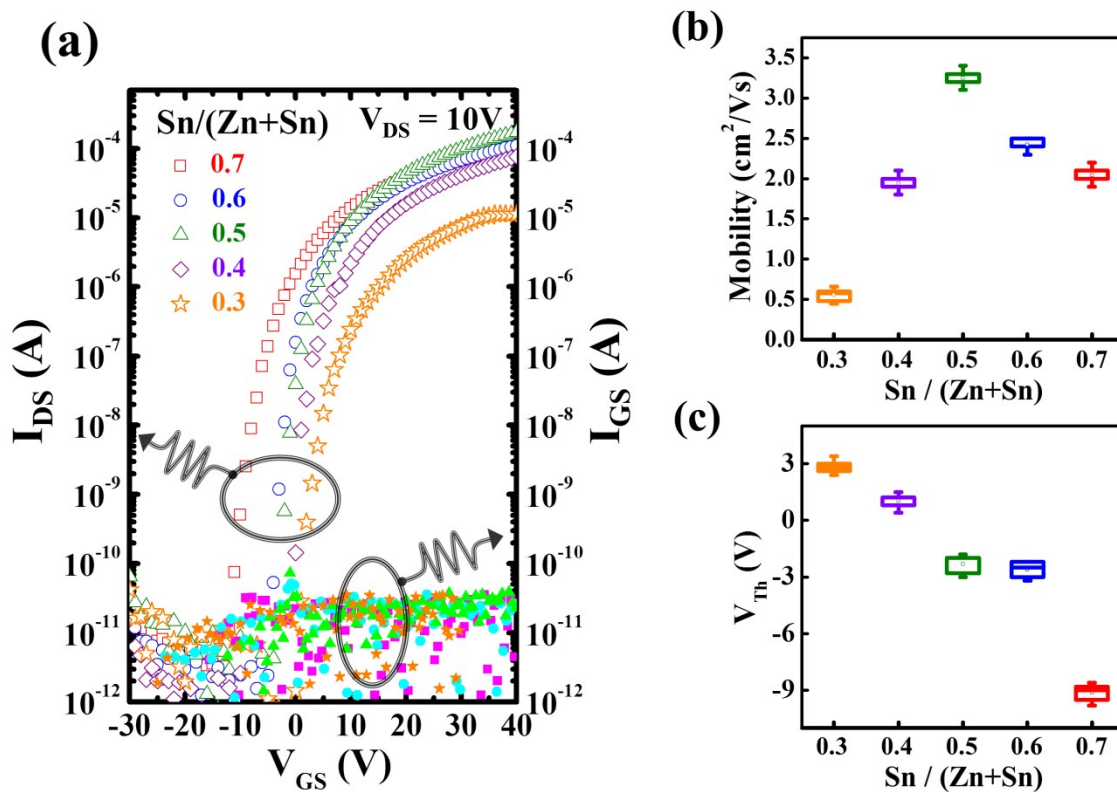

**Figure S5.** Electrical device performance and uniformity of well-patterned solution-processed SBP + HB ZTO TFTs with various compositional ratios of Zn and Sn [ $0.3 \leq \text{Sn}/(\text{Zn} + \text{Sn}) \leq 0.7$ ]. (a) Transfer characteristics at  $V_{DS} = 10\text{ V}$ , (b) field-effect mobility, and (c) threshold voltage.

### Mo lift-off process to evaluate chemical durability against various metal wet-etchants

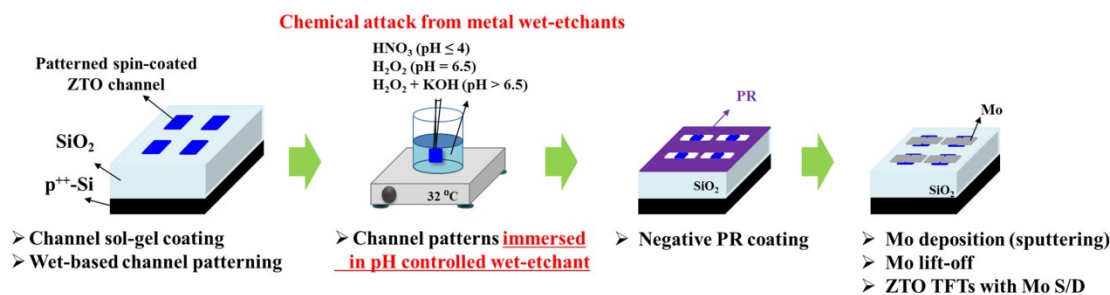

### Conventional Mo lift-off process

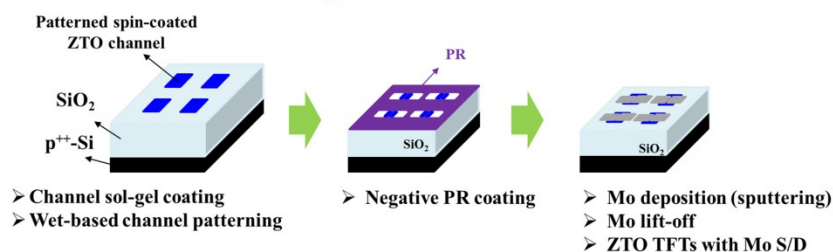

### Conventional Mo wet-etching process

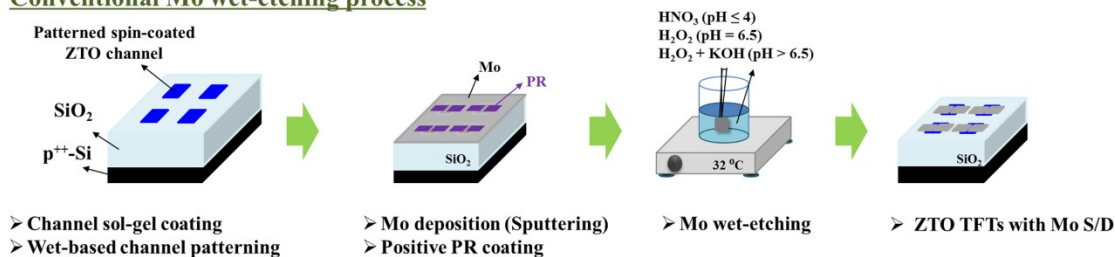

**Figure S6.** Lift-off process designed to evaluate chemical durability of ZTO channel in various wet-etchants used for Mo wet-etching process. Conventional lift-off and wet-etch processes to define Mo S/D electrodes for oxide TFTs with bottom-gate and top-contact structure.
